# Supplementary material for: Traumatic diaphragmatic hernia: 28-years analysis at a Brazilian university hospital
Source: Research Square preprint supplement (doi:10.21203/rs.3.rs-121284/v1), 2020-12-17
Supplement: Supplementary file 1 [file 36936d987a433dd0fefb71c1.xlsx]

## Sheet: Folha 1 - HERNIA DIAFRAG DADOS
HERNIA DIAFRAG DADOS
1
N	NOME	SEXO	IDADE	HC	ADMISSÃO	TRAUMA PEN	TRAUMA CONT	LOCALIZAÇÃO (1 - 5)	PAS	RTS	HERNIA DIAFRAGMÁTICA	ORGÃO HERNIADO	DIAGNÓSTICO (CLINICO, RX, RXC, LAPA, LAPS, TC)	RX SIMPLES (1-5)	RX CONTRAST(1-2)	LPD (+ , - , INC)	LAPAROSC (LESAO, FP, FN)	JANELA	ECO	INDICAÇÃO CIRURGIA (1 - 5)	CIRURGIA (TORACO,LAPA,LAPS,TORACO+LAPA)	INTERVALO ATÉ CIRURGIA (DX.CX)	GRAU	LADO	ORGÃOS ASSOCIADOS	OUTROS APARELHOS	ISS	TRISS	COMPLICAÇÕES (1 - 18)	DIAS DE INTERNACAO	ÓBITO	OBITO CAUSA	ALTA
	ND	F	30	737477	07/02/1990	Sim FAB	NAO	TORAX + ABDOME	50	5.14	SIM	ESTOMAGO BACO	LAPAROTOMIA	N	N	N REALIZADO	N REALIZADO	N	N	CLINICA IMEDIATA	TORACO+LAPA	<24H	4	BILAT	FIG , ESTO, BACO, PULMAO, CORACAO	N	18	0.89	PNEUMONIA+ATELECTASIA	9	NÃO		SIM
	EDC	M	30	3401291	02/11/1991	Sim FAB	NAO	TORACO ABDOMINAL	120	7.84	SIM	EPIPLON	RX	PNEUMOPERiTONEO	N	N	N	N	N	RX	LAPA	>24H (3 DIAS)	2	ESQ	N	N	9	0.99	N	10	NÃO		SIM
	RLS	M	18	3432898	06/12/1991	NAO	Sim ACIDENTE AUTOMOB	ABDOME	80	6.80	SIM	ESTOMAGO,COLON,DELGADO,BACO	RX	HERNIA	N	N	N	N	N	CLINICA + RX	LAPA	<24H	5	ESQ	RIM,BACO	FRATURA BACIA,FEMUR,FACE	43	0.88	N	11	NÃO		SIM
	CTB	M	23	3766142	16/10/1992	NAO	Sim ACIDENTE AUTOMOB	ABDOME	80	4.93	SIM	ESTOMAGO	RX	HERNIA	ESTOMAGO NO TORAX	Y NEG	N	N	N	RX	LAPA	>24H (5 DIAS)	5	ESQ	N	N	25	0.83	PNEUMONIA	22	NÃO		SIM
	CAM	M	25	3790092	08/11/1992	NAO	Sim ACIDENTE AUTOMOB	ABDOME	100	7.54	SIM	ESTOMAGO,BACO,COLON,RIM D,DELGADO	RX	HERNIA	N	N	N	N	N	RX	LAPA	<24H	4	ESQ	BACO RETO BEXIGA	FRATURA BACIA	43	0.92	PNEUMONIA	10	NÃO		SIM
	JJS	M	44	371095	13/06/1994	NAO	Sim ATROPELAMENTO	ABDOME	50	5.14	SIM	ESTOMAGO	RX	HERNIA	N	N	N	N	N	RX	LAPA	<24H	5	ESQ	BACO	FRATURA BACIA, LESOES EXTERNAS TCE	50	0.42	PNEUMONIA + ENCEFALOPATIA	13	NÃO		SIM
	NDS	M	55	4297598	24/01/1994	NAO	Sim ESPANCAMENTO	ABDOME	120	7.84	SIM	EPIPLON	RX	HERNIA	N	N	N	N	N	RX + CLINICA	LAPA	>24H (3-4)	3	ESQ	N	N	9	0.99	N	9	NÃO		SIM
	AFDN	M	52	4749181	15/11/1994	NAO	Sim ATROPELAMENTO	TORACO ABDOMINAL	60	3.26	SIM	FIGADO	LAPAROTOMIA	N	N	N	N	N	N	CLINICA	TORACO+LAPA	<24H	5	DIR	FIGADO PULMAO	OSSOS LONGOS	41	0.27	COAGULOPATIA + CHOQUE HEMORRAGICO REFRATARIO	1	SIM	CHOQUE COAG	N
	ZMS	F	59	5129742	25/08/1995	NAO	Sim ATROPELAMENTO	ABDOME	110	7.84	SIM	COLON	RX	HERNIA	N	N	SIM - FALSO NEGATIVO	N	N	CLINICA + RX	LAPA	>24H 2-3	3	ESQ	BACO BEXIGA	FACE + LESÕES EXTERNAS	29	0.90	ATELECTASIA	18	NÃO		SIM
	OSS	M	22	5557357	13/07/1996	NAO	Sim ACIDENTE AUTOMOB	ABDOME	130	7.84	SIM	ESTOMAGO BACO	RX	HERNIA	N	NN	N	N	N	CLINICA + RX	LAPA	<24H	5	ESQ	BACO	FRATURAS OSSOS LONGOS, LESOES EXTERNAS, FACE	34	0.98	N	6	NÃO		SIM
	FAP	M	19	5640310	11/09/1996	NAO	Sim ESPANCAMENTO	ABDOME	120	7.84	SIM	ESTOMAGO,BACO,COLON	RX	HERNIA	N	N	N	N	N	RX	LAPA	>24H (3-4)	3	ESQ	N	N	10	0.99	N	7	NÃO		SIM
	JRR	M	29	5670179	06/10/1996	Sim FAB	NAO	TORACO ABDOMINAL	130	7.84	SIM	FIGADO	LAPAROTOMIA	N	N	N	N	N	N	CLINICA	LAPA	<24H	3	ESQ	FIGADO	N	18	0.99	EMPIEMA	11	NÃO		SIM
	DCG	M	31	4393829	14/10/1996	Sim FAB	NAO	ABDOME	120	7.84	SIM	TRANVERSO EPIPLON	LAPAROSCOPIA	HERNIA	N	N	SIM LESAO	N	N	RX + LAPAROSCOPIA	LAPA	>24H (5 DIAS)	2	ESQ	N	N	9	0.99	N	7	NÃO		SIM
	WRB	M	22	5725146	15/11/1996	NAO	Sim ACIDENTE AUTOMOB	ABDOME	120	7.84	SIM	ESTOMAGO,COLON,BACO	RX	HERNIA	N	N	N	N	N	RX	LAPA	<24H	3	ESQ	N	N	22	0.99	N	5	NÃO		SIM
	AT	M	45	5766627	18/12/1996	NAO	Sim ATROPELAMENTO	ABDOME	80	5.23	SIM	ESTOMAGO BACO	LAPAROTOMIA	HERNIA	N	Y NEG	N	N	N	CLINICA	LAPA	>24H 2 DIAS	3	ESQ	N	N	50	0.42	TEP	4	SIM	TEP	N
	ANDA	M	13	5772357	01/01/1997	Sim FAB	NAO	TORACO ABDOMINAL	120	7.84	SIM	ESTOMAGO	LAPAROSCOPIA	HERNIA	N	N	SIM LESAO	N	N	RX+LAPAROSCOPIA	LAPA	<24H	3	ESQ	ESTOMAGO	N	18	0.99	EMPIEMA PNEUMIONIA	17	NÃO		SIM
	OMNC	F	42	5797329	23/01/1997	NAO	Sim ACIDENTE AUTOMOB	ABDOME	130	7.84	SIM	ESTOMAGO BACO	RX	HERNIA	N	N	N	N	N	RX	LAPA	<24H	5	ESQ	MESENTERIO (DELGADO)	FRATURA OSSOS LONGOS TCE	38	0.97	COAGULOPATIA + CHOQUE HEMORRAGICO REFRATARIO	2	SIM	CHOQUE COAG	N
	CGL	M	27	5808075	02/02/1997	NAO	Sim ACIDENTE AUTOMOB	ABDOME	90	7.84	SIM	ESTOMAGO	RX	HERNIA	N	Y POS	N	N	N	RX+LPD	LAPA	<24H	3	ESQ	FIGADO BACO MESENTERIO (DELGADO)	FRATURAS OSSOS LONGOS, LESOES EXTERNAS	14	0.99	N	11	NÃO		SIM
	JJP	M	31	5907722	21/04/1997	NAO	Sim ACIDENTE AUTOMOB	ABDOME	60	3.55	SIM	ESTOMAGO	LAPAROTOMIA	N	N	N	N	N	N	CLINICA	LAPA	<24H	3	DIR	BACO FIGADO COLON	FRATURAS OSSOS LONGOS, LESOES EXTERNAS, FACE	36	0.35	PNEUMONIA +EMPIEMA	20	NÃO		SIM
	VR	M	55	5951630	25/05/1997	NAO	Sim ACIDENTE AUTOMOB	ABDOME	60	5.14	SIM	CORACAO	LAPAROTOMIA	N	N	N	N	N	N	CLINICA	TORACO+LAPA	<24H	4	ESQ	FIGADO BACO	FACE	38	0.19	CHOQUE / COAGULOPATIA	1	SIM	CHOQUE COAG	N
	LHM	M	35	6003216	03/07/1997	NAO	Sim ATROPELAMENTO	ABDOME	90	7.84	SIM	ESTOMAGO	RX	HERNIA	N	N	N	N	N	CLINICA + RX	LAPA	<24H	4	ESQ	N	N	21	0.99	ONUEMONIA+IRA+SEPSE	9	SIM	IMOS	N
	MBC	M	27	6019273	15/07/1997	NAO	Sim ACIDENTE AUTOMOB	ABDOME	120	7.84	SIM	ESTOMAGO BACO	RX	HERNIA	N	N	N	N	N	RX	LAPA	<24H	3	ESQ	BACO	LESOES EXTERNAS	13	0.99	EMPIEMA	6	NÃO		SIM
	DESCONHECIDO	M	21	6159556	31/10/1997	Sim FAF	NAO	ABODME	60	5.14	SIM	ESTOMAGO	LAPAROTOMIA	N	N	N	N	N	N	CLINICA IMEDIATA	TORACO+LAPA	<24H	2	DIR	FIGADO PULMAO COLON	LESOES EXTERNAS	18	0.89	CHOQUE / COAGULOPATIA	1	SIM	IMOS	N
	CPL	M	34	5071341	29/11/1997	NAO	Sim ACIDENTE AUTOMOB	ABDOME	140	7.84	SIM	ESTOMAGO	RX	HERNIA+HEMOPNEUMOTORAX	N	N	N	N	N	RX	LAPA	<24H	5	ESQ	BACO	TCE	17	0.99	PNEUMONIA+ATELECTASIA	9	NÃO		SIM
	FPF	M	38	6201474	07/12/1997	Sim FAB	NAO	TORACO ABDOMINAL	120	7.84	SIM	EPIPLON	LAPAROSCOPIA	NORMAL	N	N	Y	N	N	TORACOSCOPIA	LAPAROSCOPIA+TORACOSCOPIA	<24H	2	ESQ	ESTOMAGO COLON	N	22	0.99	ABCESSO INTRA ABDOMINAL	10	NÃO		SIM
	AJS	M	46	6206460	11/12/1997	Sim FAF	NAO	TORACO ABDOMINAL	120	7.55	SIM	FIGADO	LAPAROTOMIA	PNEUMOTORAX	N	N	N	N	N	CLINICA IMEDIATA	LAPA	<24H	3	DIR	FIGADO	LESOES EXTERNAS	19	0.99	N	10	NÃO		SIM
	MP	M	28	6323119	27/03/1998	Sim FAB	NAO	TORACO ABDOMINAL	140	7.84	SIM	COLON	RX	HERNIA	N	N	N	Y	N	RX	LAPA	<24H	3	ESQ	FIGADO	LESOES EXTERNAS	14	0.99	N	3	NÃO		SIM
	JAV	M	28	6389567	20/05/1998	Sim FAF	NAO	TORAX + ABDOME	130	7.84	SIM	PULMAO	LAPAROTOMIA	N	N	N	N	N	N	CLINICA IMEDIATA	LAPA	<24H	3	DIR	FIGADO PULMAO	FRATURA DE C7 LESOES EXTERNAS	22	0.98	N	9	NÃO		SIM
	NNS	M	26	6488228	13/08/1998	Sim FAF	NAO	TORACO ABDOMINAL	120	7.84	SIM	ESTOMAGO EPIPLON	LAPAROTOMIA	PNEUMOTORAX	N	N	N	N	N	CLINICA IMEDIATA	LAPA	<24H	2	ESQ	N	N	9	0.99	PNUEMONIA + IRA	15	NÃO		SIM
	ESDS	M	36	6646274	01/01/1999	NAO	Sim ACIDENTE AUTOMOB	TORACO ABDOMINAL	130	7.84	SIM	ESTOMAGO EPIPLON	RX	HERNIA	Y EED HERNIA	N	N	N	N	RX	LAPA	<24H	4	ESQ	ESTOMAGO	N	19	0.99	N	7	NÃO		SIM
	MFM	F	43	6836728	10/06/1999	NAO	Sim ACIDENTE AUTOMOB	TORACO ABDOMINAL	180	7.84	SIM	ILEO	RX	HERNIA	N	N	N	N	N	RX	LAPA	<24H	3	DIR	N	N. *GESTANTE*	9	0.99	INFECCAO DE PAREDE + PNEUMONIA	32	NÃO		SIM
	RV	M	53	6846434	20/06/1999	Sim FAB	NAO	TORACO ABDOMINAL	100	7.84	SIM	ESTOMAGO EPIPLON	LAPAROTOMIA	N	N	N	N	N	N	CLINICA IMEDIATA	LAPA	<24H	5	ESQ	ESTOMAGO BACO	Y LESOES EXTERNAS	18	0.99	N	9	NÃO		SIM
	RMS	M	29	7024106	20/11/1999	NAO	Sim ACIDENTE AUTOMOB	ABDOME	100	4.87	SIM	ESTOMAGO	RX	HERNIA	N	Y POS	N	N	N	RX	LAPA	<24H	4	ESQ	N	TCE	22	0.88	TCE	1	SIM	TCE	N
	PA	M	34	7101598	06/02/2000	Sim FAB	NAO	TORACO ABDOMINAL	110	7.84	SIM	ESTOMAGO	RX	HERNIA	N	N	N	N	Y	RX	LAPA	<24H	3	DIR	COLON VESICULA FIGADO	LESOES EXTERNAS	18	0.99	N	39	NÃO		SIM
	PASA	F	36	6640482	21/11/2000	NAO	Sim ACIDENTE AUTOMOB	ABDOME	70	6.38	SIM	FIGADO	LAPAROTOMIA	N	N	Y POS	N	N	N	LPD	LAPA	<24H	4	DIR	FIGADO PERINEO	FRATURA DE BACIA	22	0.97	N	11	NÃO		SIM
	EFS	M	16	7729752	11/08/2001	Sim FAF	NAO	TORACO ABDOMINAL	130	7.84	SIM	ESTOMAGO BACO	LAPAROTOMIA	N	N	N	N	N	N	CLINICA IMEDIATA	LAPA	<24H	4	ESQ	ESTOMAGO BACO	LESOES EXTERNAS	26	0.99	N	11	NÃO		SIM
	JB	M	49	8156297	15/08/2002	NAO	Sim ATROPELAMENTO	ABDOME	100	7.84	SIM	TRANSVERSO	RX	HERNIA	N	N	N	N	N	RX	TORACO+LAPA	>24H CRONICO (3 MESES)	3	ESQ	N	N	16	0.99	EMPIEMA	60	SIM	IMOS	N
	MCF	M	53	8369470	09/03/2003	NAO	Sim ACIDENTE AUTOMOB	ABDOME	60	5.14	SIM	ESTOMAGO BACO	RX	HERNIA	N	N	N	N	N	RX	LAPA	<24H	3	ESQ	N	TCE TRM LESOES EXTERNAS	45	0.51		28	NÃO		SIM
	JQ	M	39	8804791	10/05/2004	NAO	Sim ATROPELAMENTO	ABDOME	40	5.34	SIM	ESTOMAGO,BACO,COLON	RX	HERNIA	N	N	N	N	N	RX	LAPA	<24H	3	ESQ	N	FRATURA BACIA LESOES EXTERNAS	38	0.71	COAGULOPATIA + CHOQUE HEMORRAGICO REFRATARIO	1	SIM	CHOQUE	N
	DBF	M	25	9682734	02/02/2007	NAO	Sim ACIDENTE AUTOMOB	ABDOME	120	7.84	SIM	ESTOMAGO	RX	HERNIA	N	N	N	N	N	RX	LAPA	<24H	4	ESQ	N	FRATURA BACIA	14	0.99	N	8	NÃO		SIM
	BRDV	M	25	9682934	04/02/2007	NAO	Sim ACIDENTE AUTOMOB	ABDOME	130	7.84	SIM	ESTOMAGO	RX	HERNIA	N	N	N	N	N	RX	LAPA	<24H	4	ESQ	BACO	LESOES EXTERNAS FRATURA OSSOS LONGOS	27	0.99	INFECCAO DE PAREDE, PNEUMONIA, OSTEOMIELITE	55	NÃO		SIM
	VMS	F	33	7524647	16/05/2008	NAO	Sim ATROPELAMENTO	ABDOME	110	7.84	SIM	ESTOMAGO	RX	HERNIA	N	N	N	N	N	RX	LAPA	<24H	4	ESQ	N	FRATURA OSSOS LONGOS PNEUMOTORAX	17	0.98	PNEUMONIA	17	NÃO		SIM
	EBF	M	32	10103575	28/05/2008	NAO	Sim ACIDENTE AUTOMOB	ABDOME	90	7.84	SIM	ESTOMAGO BACO	RX	HERNIA	N	N	N	N	N	RX	LAPA	<24H	4	ESQ	BACO	FRATURAS OSSOS LONGOS + BACIA	34	0.95	N	7	NÃO		SIM
	EMBS	F	40	10108214	22/06/2008	NAO	Sim ATROPELAMENTO	ABDOME	130	7.84	SIM	ESTOMAGO BACO COLON	RX	HERNIA	N	N	N	N	N	RX	LAPA	<24H	4	ESQ	BACO	N	11	0.99	N	4	NÃO		SIM
	ADA	M	49	3961893	01/08/2008	NAO	Sim ACIDENTE AUTOMOB	ABDOME	100	7.84	SIM	ESTOMAGO COLON DELGADO	RX	HERNIA	N	N	N	N	N	RX	LAPA	<24H	4	ESQ	HEPATICA , CECO	FRATURA BACIA	48	0.93	CHOQUE / COAGULOPATIA	1	SIM	CHOQUE COAG	N
	LCS	M	31	10477407	03/08/2009	Sim FAF	NAO	TORACO ABDOMINAL	120	7.84	SIM	ESTOMAGO COLON TRANSVERSO BACO DELGADO	RX + TC	HERNIA	N	N	N	N	N	RX+TC	LAPA	>24H CRONICO (6 MESES)	4	ESQ	N	N	17	0.98	N	5	NÃO		SIM
	LHCC	M	18	10712120	10/05/2010	NAO	Sim ACIDENTE AUTOMOB	ABDOME	120	7.84	SIM	FIGADO+VESICULA BILIAR	TC	N	N	N	N	N	N	TC	LAPA	<24H	4	DIR	FIGADO	HEMOPNEUMOTORAX + FRATURA BACIA	17	0.98	N	10	NÃO		SIM
	LAC	F	26	11584403	23/04/2013	NAO	Sim ACIDENTE AUTOMOB	TORAX + ABDOME	120	7.84	SIM	ESTOMAGO	RX+TC	HERNIA	N	N	N	N	N	RX	LAPA	>24H (3 DIAS)	3	ESQ	ESTOMAGO	N	26	0.98		23	NÃO		SIM
	TMR	M	48	11647762	08/07/2013	NAO	Sim ATROPELAMENTO	ABDOME	60	3.56	SIM	ESTOMAGO BACO	LAPAROTOMIA	N	N	N	N	N	N	CLINICA IMEDIATA	LAPA	<24H	4	ESQ	BACO CORACAO	FRATURA BACIA	36	0.36	N	1	SIM	CHOQUE	N
	VDA	M	52	11751953	07/11/2013	NAO	Sim ATROPELAMENTO	ABDOME	90	7.84	SIM	ESTOMAGO EPIPLON COLON	TC	HERNIA	N	N	N	N	N	TC	LAPA	<24H	4	ESQ	BACO	FRATURA DE BACIA + MI E MS	22	0.98	PNEUMONIA AMPUTACAO DE MEMBROS INFERIORES	61	NÃO		SIM
	AMDS	F	57	11756903	16/11/2013	NAO	Sim ACIDENTE AUTOMOB	TORACO ABDOMINAL	130	7.84	SIM	COLON TRANSVERSO	RX + TC	HERNIA	N	N	N	N	N	TC	LAPA	>24H (3-4)	2	ESQ	N	FRATURA COSTELAS	24	0.89		17	NÃO		SIM
	JRPVB	M	19	12177817	22/05/2015	NAO	Sim ACIDENTE AUTOMOB	ABDOME	80	6.17	SIM	FIGADO	LAPAROTOMIA	N	N	N	N	N	N	CLINICA	LAPA	24-48H	5	DIR	RIM D , PANCREAS, FIGADO, DELGADO	LESOES EXTERNAS	22	0.93	N	9	NÃO		SIM
	MAM	M	34		28/10/2015	NAO	Sim QUEDA ALTURA	ABDOME	120	7.84	SIM	ESTOMAGO BACO COLON	RX	HERNIA	N	N	N	N	N	TC	LAPA	<24H	3	ESQ	BACO	TRM	50	0.84	PNEUMONIA +EMPIEMA	28	NÃO		SIM
	RJQ	M	30	5842009	01/10/2016	NAO	Sim ACIDENTE AUTOMOB	ABDOME	120	7.84	SIM	ESTOMAGO BACO COLON TRANSVERSO DELGADO	TC	Y	N	N	N	N	N	TC	LAPA	>24H (5 DIAS)	3	ESQ	ESTOMAGO (PERFURACAO)	FRATURA BACIA, UMERO LESOES EXTERNAS	24	0.98	EMPIEMA	36	NÃO		SIM
	VHM	M	21	12802955	23/08/2017	NAO	Sim ACIDENTE AUTOMOB	ABDOME	100	7.84	SIM	ESTOMAGO	RX+TC	HERNIA	N	N	N	N	N	RX+TC	LAPA	<24H	4	ESQ	BEXIGA EXTRAPERITONEAL + LESAO AORTA TORACICA	FRATURA DE OSSOS LONGOS	34	0.96	PNUEMONIA	45	NÃO		SIM
